# Supplementary material for: Widespread JNK-dependent alternative splicing induces a positive feedback loop through CELF2-mediated regulation of MKK7 during T-cell activation
Source: PubMed Central journal article supplement — Genes Dev. 2015 Oct 1;29(19):2054–66. doi: 10.1101/gad.267245.115 (PMC4604346; doi:10.1101/gad.267245.115), 2015-10-01
Supplement: supp_29.19.2054_Table_S6.pdf [file supp_29.19.2054_Table_S6.pdf]

**Table S6: Primers****Primers used for RT-PCR analysis**

| Gene          | Forward Primer 5'-3'           | Reverse Primer 5'-3'              | Ta |
|---------------|--------------------------------|-----------------------------------|----|
| BAX           | CTCTGAGCAGATCATGAAGACAGG       | GAAAACATGTCAGCTGCCACTCG           | 65 |
| CAMTA1        | GCGAGGAGGAGGAGGATGTGGC         | CTCATTAGTGTTCCAGCGGTGCC           | 65 |
| CCAR1         | CACTGGTCTCCTTCGTTGGATGGACC     | GTCTTTGGATCAAGTTTAGACCAATGGGTAGG  | 70 |
| CELF2         | CTGCAGATAGTGAAAAGTCCAACGCTGTGG | CCCAGGTGGCAGTGTTGAGCTGCTGC        | 70 |
| FIP1L1        | GAGGTGCGAGCGCCTAGTGTCGGAG      | GCGATGATGATGAAGATGATGTTTCATGTCCAC | 65 |
| LEF1          | GAGAGAGAACTACAGGAATCTGCATCAG   | CAAGCTTCCATCTCCAGAAGAGGTCC        | 70 |
| LUC7L         | CTG CCT GAG AGA AGT CGT CGC G  | CGT CCC AGC CAG GAT GTC ATG GG    | 65 |
| MKK7          | CGACCTCAACCTGGATATCAGCC        | GGAGCTCTCTGAGGATGGCGAGC           | 65 |
| MTF2          | AAGATATGAGCATGTTCTGGAGGC       | GTATATGGGCCAGGTGGACGACC           | 65 |
| PRPF3         | CTGTTTGAGGCTGTGGAGGAAGGC       | GGAGCTTAGTCAGCATGCCAGGG           | 65 |
| RBM3          | GTCAAGGACCGGGAGACTCAGCGG       | GCAGACTTGCCTGCATGATCCACACGG       | 70 |
| RNF34         | AGGAGGTGCGCAGTGTGAGGAGC        | CTGAATGGACCGGTGGCTCCTGC           | 70 |
| SMARCA4       | CTCGTGGATCATCAAGGACGACG        | CGCTTCCGTGATGATTTCTTCTGC          | 65 |
| TRA2A         | TGGTTGCCGACTCTTTCCTCTTCC       | CTACGAGATCCTGACCTGCTCTCC          | 70 |
| ZDHHC20       | CTTGGGTGATGGTTGCAGTTTTCC       | CTGAGATTCACTGTCCAACAAGCG          | 65 |
| TNF- $\alpha$ | CACCATGAGCACTGAAAGCATGATCCG    | GGCCAGAGGGCTGATTAGAGAGAGG         | 60 |
| B2M           | CTCGCGCTACTCTCTTTCTGG          | ATGGATGAAACCCAGACACATAGC          | 60 |

**Primers used for cloning and *in vitro* transcription**

| Gene             | Primer 5'-3'                                    | Ta |
|------------------|-------------------------------------------------|----|
| MKK7I1-2 NdeI-F  | GGAATTCATATGCCTCCTCCTCGTTTATGATTTGATTTTC        | 65 |
| MKK7I1-2 PstI-R  | AAAACCTGCAGTAACTGGATGGGGAAAAGGAAGAAA            | 65 |
| MKK7I2-3 PstI-F  | AAAACCTGCAGCAGGTACCAGCCTTTTTATCATCGC            | 70 |
| MKK7I2-3 BglII-R | GGAAGATCTGGACGCCATTCTGCGGCCGGG                  | 70 |
| MKK7I1-2 T7-F    | TAATACGACTCACTATAGGCCTCCTCCTCGTTTATGATTTGATTTTC | 70 |
| MKK7I2-3-R       | GGACGCCATTCTGCGGCCGGG                           | 70 |
| Beta-globin T7-F | TAATACGACTCACTATAGGGACCAATAGAACTGGGCATATGG      | 65 |
| Beta-globin-R    | CTTCTCTGTCTCCACATGCCAG                          | 65 |
| JNK1a1- BamHI-F  | cgcGGATCCagcagaagcaagcgtgacaaca                 | 65 |
| JNK1a1-XbaI-R    | ctagtctagaTCACTGCTGCACCTGTGCTAAAG               | 65 |
| MKK7cDNA-BamHI-F | CGCGGATCCATGGCGGCGTCCCTCCCTGGAAC                | 65 |
| MKK7cDNA-EcoRI-R | CCGGAATTCCTACCTGAAGAAGGGCAGGTGGGGC              | 65 |
| MKK7-LcDNA-R     | GGTCTTCCGGAAGCGCATCTTCC                         | 65 |
